20 **Abstract**

21 **Objective:** This study aimed to analyze the demographic, temporal, and spatial characteristics of  
22 rabid animal bite (RAB) cases in humans across 12 upazilas within Mymensingh district of  
23 Bangladesh.

24 **Methods:** Retrospective hospital-based data from RAB cases for 2022 and 2023 were collected  
25 from S.K Hospital. The dataset included information on victim demographics, bite details,  
26 vaccination information, and Rabies Immune Globulin (RIG) administration. Additionally,  
27 monthly case counts from 2016 to 2023 were sourced and analyzed to identify trends. Descriptive  
28 statistics and time series analysis using the seasonal decomposition technique were conducted. The  
29 risk maps for rabid animal bites in 2022 and 2023 were generated using a standardized incidence  
30 rate ratio (SIRR) approach.

31 **Findings:** An almost two-fold increase in the proportion of category 3 bites receiving Rabies  
32 Immune Globulin (RIG) from 3.6% in 2022 to 6.5% in 2023 was noted. Only 9.7% of bite cases  
33 in 2022 and 16.9% in 2023 received the vaccine promptly after the incident. However, the majority  
34 received vaccines within the first 24 hours after being bitten. Moreover, significant seasonal  
35 patterns and year-wise increasing trends in RAB cases were observed. Males and individuals <10  
36 years old had a higher risk of being bitten. Dogs (48.2% in 2022) and cats (52.6% in 2023) were  
37 identified as the primary animals responsible for the bites. Notably, the legs were the body part  
38 most frequently bitten. The bites risk map identified four high risk upazilas.

39 **Conclusion:** There is a significant gap in ensuring timely vaccination delivery. Study results also  
40 suggest other potential improvements in healthcare practices or treatment protocols. Increasing  
41 RAB cases highlights the need to enhance surveillance and control measures. Targeted awareness  
42 campaigns and preventive measures tailored to high-risk groups – including males, children <10

43 years old, dogs and cats – are imperative. Coordinated efforts among healthcare professionals,  
44 policymakers, and community stakeholders are crucial to effectively mitigate the incidence of  
45 RAB cases, safeguarding public health and eradicate dog mediated rabies by 2030 in the region.

46 **Key words:** Rabies, incidence rate ratio, risk map, dogs, cats, dogs, targeted intervention

## 47 **1. Introduction**

48 Rabies, caused by Lyssavirus type 1 of the Rhabdoviridae family, is a fatal viral infection of the  
49 central nervous system that results in progressive encephalomyelitis (1-3). The virus is typically  
50 present in the saliva of clinically ill mammals, which can then be transmitted to other mammals  
51 (including humans) through a bite, scratch, or lick (4). Rabies manifests in two epidemiological  
52 conditions: urban, primarily transmitted by dogs or less commonly by cats; and sylvatic, carried  
53 by wolves, foxes, raccoons, weasels, and bats (5).

54 In humans, transmission mainly occurs from canines, as well as from cats, mongoose, bats, and  
55 in rare cases, farm animals (6). Globally, > over 1.4 billion people are at risk of rabies, and  
56 approximately 45% of rabies-related deaths occur in Asia (7). Human rabies cases that result from  
57 dog bites constitute 97% of all cases (8). Bangladesh ranks third after India and China in terms of  
58 rabies mortalities, with >2100 people dying annually (9). Dogs (90%), cats (6%), jackals (3%),  
59 and mongoose (1%) were reported to be responsible for human bites in Bangladesh (9).

60 The most effective strategy for preventing human rabies is to target the animal reservoir, using  
61 mass dog vaccination to stop transmission (10). The World Health Organization (WHO) and its  
62 partners, including the World Organization for Animal Health (OIE), the Food and Agriculture  
63 Organization of the United Nations (FAO) and the Global Alliance for Rabies Control (GARC),  
64 have adopted a goal to eliminate dog-mediated human rabies by 2030 by controlling the disease in  
65 dogs (11). In developed countries, concerted efforts such as mass vaccination of dogs and

66 administering oral vaccines to wildlife have significantly contributed to the eradication of rabies  
67 among dogs, resulting in a subsequent decrease in human rabies cases (12). Nevertheless, timely  
68 wound management is crucial as an emergency medical response in disease control measures (13).

69 Rabies cases often do not fully represent the disease burden due to negligence and possible  
70 underreporting in specific areas (14). Unreported cases and a lack of understanding of  
71 epidemiological trends pose a significant threat to the efficient execution of preventive and control  
72 measures (15, 16). In Bangladesh, inadequate surveillance and reporting systems, together with  
73 widespread misconceptions among the general population, hinder proper documentation of  
74 epidemiological data on animal bite cases and fatalities (17). Furthermore, limited financial  
75 resources impede the conduct of surveys to determine rabies incidence in animals, and there are  
76 limited opportunities for post-treatment studies of patients. Additionally, the lack of laboratory  
77 confirmation in the identification of rabid animals, primarily due to financial and logistical  
78 limitations, further exacerbates the issues (18).

79 Implementing measures to decrease animal bite incidence is one of the critical approaches to  
80 controlling rabies (2). A comprehensive strategy for eradicating rabies in Bangladesh has been in  
81 place since June 2010 (19). Since 2011, these initiatives have resulted in a declining pattern in  
82 human rabies-related fatalities in recent years. However, the number of cases remains notable (15).

83 Understanding the demographic, spatial and temporal patterns of rabies in humans is crucial for  
84 assessing risks and developing targeted interventions. To do so, the current study investigated the  
85 demographic, temporal, and spatial characteristics of human rabid animal bite (RAB) cases in the  
86 Mymensingh district.

## 87 **2. Methodology**

### 88 2.1. Study design and data source

89 A retrospective hospital-based cross-sectional study was conducted to collect secondary data on  
90 cases of animal bites that occurred from January 2022 to December 2023. The data were retrieved  
91 from registers maintained at the Government S.K. Hospital in Mymensingh District. The data  
92 included victim's address, age, sex, location of the bite, type of animal involved, date of the attack,  
93 date of vaccination, and details on the amount of HRIG provided, as well as the injury category.  
94 Additionally, we collected monthly total number of cases from 2016 to 2023 to assess the seasonal  
95 patterns and yearly trends in animal bite cases. No data were available for the year 2020 due to the  
96 COVID-19 pandemic.

### 97 **2.2. Data processing and descriptive analysis**

98 The data for each bite case were initially entered into Microsoft Excel 2017. Subsequently, the  
99 data were imported into Jupyter Notebook, Python, for further analysis. Descriptive statistics for  
100 continuous variables, such as age and the amount of Rabies Immune Globulin (RIG) administered,  
101 were generated using the Pandas library's 'description ()' command in Python. For categorical  
102 variables, frequency distributions were created using the Pandas library's 'value counts ()'  
103 command. The proportion of each category in categorical variables was calculated by using the  
104 Pandas library's 'value\_counts ()' command with the 'normalize=True' parameter.

### 105 **2.3. Temporal distribution analysis**

106 We used a time series analysis to explore temporal patterns and trends in the dataset. The first step  
107 involved preparing the time series data, which consisted of monthly counts of rabid animal bite  
108 cases. The data were loaded as a pandas Data Frame, and the index was set to a date time format

109 to facilitate time-based analyses. An exploratory data analysis was then conducted to gain insights  
110 into the general characteristics of the time series. This included visualizations such as line plots  
111 and histograms to understand the distribution of cases over time. To identify underlying patterns  
112 within the time series, a seasonal decomposition using an additive model was performed via the  
113 'seasonal\_decompose' function from the 'statsmodels' library. This facilitated the extraction of  
114 temporal components including trend, seasonality, and residuals. To assess the stationarity of the  
115 time series, the Augmented Dickey-Fuller test was employed. This test helps determine if the time  
116 series exhibits stable behaviour over time or requires differencing.

## 117 **2.4. RAB risk mapping analysis**

118 A standardized risk ratio map was created using the following steps in Python:

### 119 **i. Global incidence calculation**

120 The global incidence of rabid bites, representing the total number of cases divided by the total  
121 population across all Upazilas, was estimated using the following formula:

$$122 \text{ Global Incidence} = \frac{\text{Total number of cases}}{\text{Total population}}$$

### 123 **ii. Expected number of cases for each Upazila**

124 The expected number of cases for each Upazila was calculated by multiplying the global incidence  
125 and the population of each Upazila as shown in equation 1:

$$126 \text{ Expected number of cases} = \text{Global Incidence} * \text{Population of Upazila} \quad (1)$$

### 127 **iii. Standardized incidence rate ratio (SIRR) calculation**

128 The Standardized Incidence Rate Ratio (SIRR) was then calculated for each Upazila by dividing  
129 the reported number of RAB cases by the expected number of cases in each Upazila according to  
130 previously described method (20) using equation (2).

131 
$$SIRR = \frac{\text{Actual number of rabid bite cases}}{\text{Expected number of cases}} \quad (2)$$

132 **iv. Geospatial data loading**

133 The Bangladesh Upazila level shape file was downloaded from the GADM maps and data  
134 (<https://gadm.org/>). The Geopandas library was used to read a shape file containing the geographic  
135 boundaries of Upazilas in Bangladesh.

136 **v. Upazila selection and filtering & geospatial data merging**

137 The Upazilas of Mymensingh district were selected and filtered to visualize the Map of  
138 Mymensingh district. The filtered geospatial data (Upazila boundaries) and the data containing  
139 SIRR values were merged based on the common Upazila names.

140 **vi. Risk ratio map creation & annotation, and visualization**

141 Using 'matplotlib' and 'geopandas', a choropleth map was created where the fill colour represented  
142 the SIRR values of each Upazila. The map was visualized with distinct colours indicating  
143 variations in standardized risk ratios. Upazila names were annotated at the centroids of their  
144 respective boundaries to enhance map readability.

145 **3. Results**

146 **3.1. Descriptive statistics**

147 The S. K. Hospital in the Mymensingh district documented 14,943 cases of human rabid animal  
148 bites in 2022 and 18,998 cases in 2023. However, only 9.7% in 2022 and 16.9% in 2023 received  
149 the vaccine promptly after the incident. The majority received the vaccine within the first 24 hours  
150 after being bitten (**Table 1**)

151 **Table 1.** Time gap between animal bite and anti-rabies vaccination

| Year | Day 0 | Day 1 | Day 2 | Day 3 | Day 4 | Day 5 | ≥ Day 6 |
|------|-------|-------|-------|-------|-------|-------|---------|
| 2022 | 1449  | 9987  | 2458  | 628   | 238   | 101   | 82      |

|      |                 |                  |                 |               |               |               |              |
|------|-----------------|------------------|-----------------|---------------|---------------|---------------|--------------|
|      | (9.7%)          | (66.8%)          | (16.5%)         | (4.2%)        | (1.6%)        | (0.7%)        | (0.5%)       |
| CP   | 9.7%)           | 76.5%            | 93.0 %          | 97.2 %        | 98.8%         | 99.5%         | 100%         |
| 2023 | 3209<br>(16.9%) | 12859<br>(67.7%) | 1994<br>(10.5%) | 588<br>(3.1%) | 170<br>(0.9%) | 104<br>(0.5%) | 74<br>(0.4%) |
| CP   | 16.9%           | 84.6%            | 95.1%           | 98.2%         | 99.1%         | 99.6%         | 100%         |

152 CP: Cumulative proportion

153 In 2022, the rabies vaccine was administered in four doses, scheduled at days 0, 3, 7, and 28.

154 However, in 2023 the vaccination protocol was revised, with only three doses given on days 0, 3,

155 and 21. Despite the change, almost all individuals completed the second dose of the vaccine course

156 in both 2022 and 2023. The proportion of people who did not complete the entire vaccination

157 course decreased from 10.3% in 2022 to 7.8% in 2023 (**Table 2**).

158 **Table 2. Completion status of full vaccination regimen**

159

| Year | Day 0           |    | Day 3            |              | Day 7            |               | Day 21           |                | Day 28           |                 |
|------|-----------------|----|------------------|--------------|------------------|---------------|------------------|----------------|------------------|-----------------|
|      | Yes             | No | Yes              | No           | Yes              | No            | Yes              | No             | Yes              | No              |
| 2022 | 14943<br>(100%) | 0  | 14906<br>(99.7%) | 37<br>(0.3%) | 14173<br>(94.9%) | 770<br>(5.2%) | –                | –              | 13398<br>(89.7%) | 1545<br>(10.3%) |
| 2023 | 18998<br>(100%) | 0  | 18958<br>(99.8%) | 40<br>(0.2%) | –                | –             | 17510<br>(92.2%) | 1488<br>(7.8%) | –                | –               |



160 The demographic characteristics of rabid animal bite cases are presented in **Table 3**. In 2022, there  
 161 were 490 cases (3.6%) categorized as type 3 bites, which increased to 6.5% in 2023, all of which  
 162 exclusively received Rabies Immune Globulin (RIG). The study found that the average age of the  
 163 cases was 25.4 years, with an interquartile range 10 to 37.0 years, thus we classify age into four  
 164 categories: up to 10 years, 11-25 years, 26-37 years, and above 37 years. In both 2022 and 2023  
 165 the highest percentage of bite cases was in the age group <10 years old, 27.4% and 30.1%,  
 166 respectively. More cases were observed in males, making up 63.2% of bite cases in 2022 and  
 167 61.2% in 2023. In 2022, dogs were the most common animals involved in the bites, accounting  
 168 for 48.2%, whereas in 2023 cats were the majority, making up 52.6%. Besides dogs and cats, foxes,  
 169 mongoose, and monkeys were also involved in bite cases. The most common biting site was the  
 170 right leg (31.5% in 2022 and 30.9% in 2023), followed by the left leg (28.5% in 2022 and 25.4%  
 171 in 2023). Additionally, there were reports of bites to the face and even the eye.

172 **Table 3. Demographic distribution of rabid animal bite cases reported in Mymensingh**  
 173 **district, Bangladesh.**

| Variables        | Category level | Number of total cases<br>(33,941) |                       |
|------------------|----------------|-----------------------------------|-----------------------|
|                  |                | Year 2022<br>(14,943)             | Year 2023<br>(18,998) |
| Injury category  | Category 2     | 14405 (96.4%)                     | 17767 (93.5%)         |
|                  | Category 3     | 538 (3.6%)                        | 1231 (6.48%)          |
| Age (Years)      | Up to 10       | 4091 (27.4%)                      | 5710 (30.1%)          |
|                  | 11-25          | 3709 (24.8%)                      | 4677 (24.6%)          |
|                  | 26-37          | 3416 (22.9%)                      | 4222 (22.2%)          |
|                  | Above 37       | 3727 (24.94%)                     | 4389 (23.1%)          |
| Sex              | Male           | 9448 (63.2%)                      | 11627 (61.2%)         |
|                  | Female         | 5495 (36.8%)                      | 7371 (38.8%)          |
| Animals involved | Dog            | 7196 (48.2%)                      | 8132 (42.8%)          |
|                  | Cat            | 7107 (47.6%)                      | 9983 (52.6%)          |
|                  | Fox            | 404 (2.7%)                        | 560 (3.0%)            |
|                  | Monkey         | 193 (1.3%)                        | 255 (1.3%)            |
|                  | Mongoose       | 43 (0.3%)                         | 68 (0.4%)             |

|              |            |              |              |
|--------------|------------|--------------|--------------|
| Biting sites | Right Leg  | 4708 (31.5%) | 5863 (30.9%) |
|              | Left Leg   | 4255 (28.5%) | 4818 (25.4%) |
|              | Right Hand | 2467 (16.5%) | 3406 (17.9%) |
|              | Left Hand  | 2243 (15.0%) | 3176 (16.7%) |
|              | Thigh      | 281 (1.9%)   | 429 (2.3%)   |
|              | Back       | 262 (1.8%)   | 376 (2.0%)   |
|              | Hip        | 245 (1.6%)   | 266 (1.4%)   |
|              | Face       | 182 (1.2%)   | 253 (1.3%)   |
|              | Abdomen    | 81 (0.54%)   | 93 (0.49%)   |
|              | Both hand  | 61 (0.41%)   | 72 (0.38%)   |
|              | Both Leg   | 52 (0.34%)   | 59 (0.31%)   |
|              | Head       | 49 (0.33%)   | 61 (0.32%)   |
|              | Neck       | 29 (0.19%)   | 85 (0.45%)   |
|              | Thorax     | 18 (0.12%)   | 21 (0.11%)   |
|              | Eye        | 11 (0.07%)   | 19 (0.1%)    |

174

### 175 3.2. Month-wise distribution of rabid animal bite cases

176 The monthly distribution of rabid animal bite cases is shown in **Figure 1**. The lowest number of  
 177 cases was observed in June in both 2022 (6.9%) and 2023 (6.5%), while the highest number of  
 178 cases was reported in November in both 2022 (11.2%) and 2023 (11.4%).

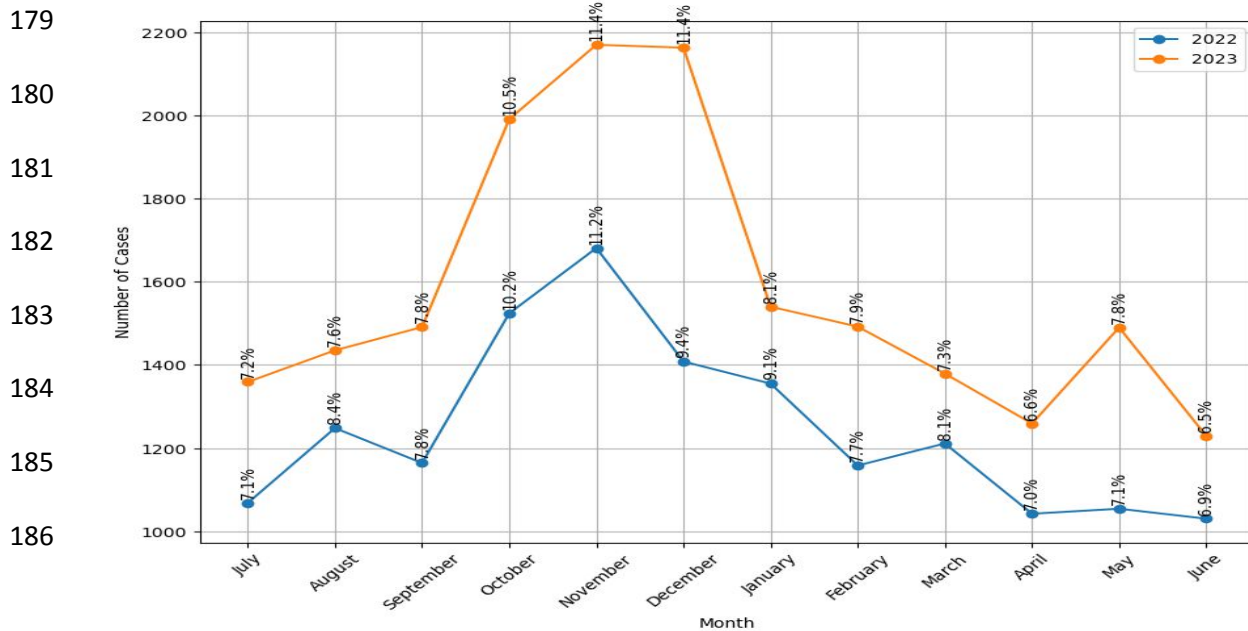

187 **Figure 1: Month wise distribution of rabid animal bite cases in 2022 and 2023**

188 **3.3. Spatial distribution of animal bite cases**

189 Rabid animal bite cases were reported from 12 Upazilas in the Mymensingh district. The highest  
 190 number of cases was recorded in Mymensingh Sadar Upazila, accounting for 56.5% (8,441 cases)  
 191 in 2022 and 52.3% (9,930 cases) in 2023. Conversely, the lowest number of cases was reported in  
 192 Dhobaura Upazila with 0.70% (105 cases) in 2022 and in Gaffargaon with 0.50% (95 cases) in  
 193 2023. Notably, during 2022 and 2023, only four upazilas (Mymensingh Sadar, Phulpur, Trishal,  
 194 and Muktagaccha) had a SIRR >1. Furthermore, only two upazilas (Mymensingh Sadar and  
 195 Trishal) exhibited a SIRR >1 in both years (**Table 4**).

196 **Table 4. Spatial distribution of rabid animal bite cases in humans in the Mymensingh district**  
 197 **during 2022-2023**

| Area             | Number of cases<br>(2022) | SIRR        | Number of cases<br>(2023) | SIRR        |
|------------------|---------------------------|-------------|---------------------------|-------------|
| Dhobaura         | 105(0.7%)                 | 0.18        | 165(0.9%)                 | 0.24        |
| Fulbaria         | 727(4.9%)                 | 0.55        | 874(4.6%)                 | 0.55        |
| Phulpur          | 1518(10.2%)               | <b>1.61</b> | 608(3.2%)                 | 0.54        |
| Gaffargaon       | 130(0.9%)                 | 0.10        | 95(0.5%)                  | 0.06        |
| Gauripur         | 578(3.9%)                 | 0.60        | 779(4.1%)                 | 0.68        |
| Haluaghat        | 130(0.9%)                 | 0.15        | 123(0.6%)                 | 0.12        |
| Ishwarganj       | 409(2.7%)                 | 0.38        | 541(2.8%)                 | 0.42        |
| Muktagachha      | 1146(7.7%)                | 0.93        | 2258(11.9%)               | <b>1.18</b> |
| Nandail          | 204(1.4%)                 | 0.18        | 515(2.7%)                 | 0.19        |
| Mymensingh Sadar | 8441(56.5%)               | <b>3.15</b> | 10443(55.0%)              | <b>3.06</b> |
| Trishal          | 1375(9.2%)                | <b>1.04</b> | 2673(14.1%)               | <b>1.36</b> |
| Bhaluka          | 180(1.2%)                 | 0.11        | 180(0.9%)                 | 0.09        |

198  
 199 **3.4. Rabid animal bite risk mapping**  
 200 The highest risk of rabid animal bites was observed in 2022 at Mymensingh Sadar Upazila (IRR:  
 201 3.15), followed by Phulpur (IRR:1.61) and Trishal (IRR: 1.04). In 2023, the highest risk was also

202 in Mymensingh Sadar (IRR: 3.06), followed by Muktagachha (IRR: 1.18) and Trishal (IRR: 1.36).  
203 The risk map of rabid animal bite cases is presented in **Figure 2(a-b)**.

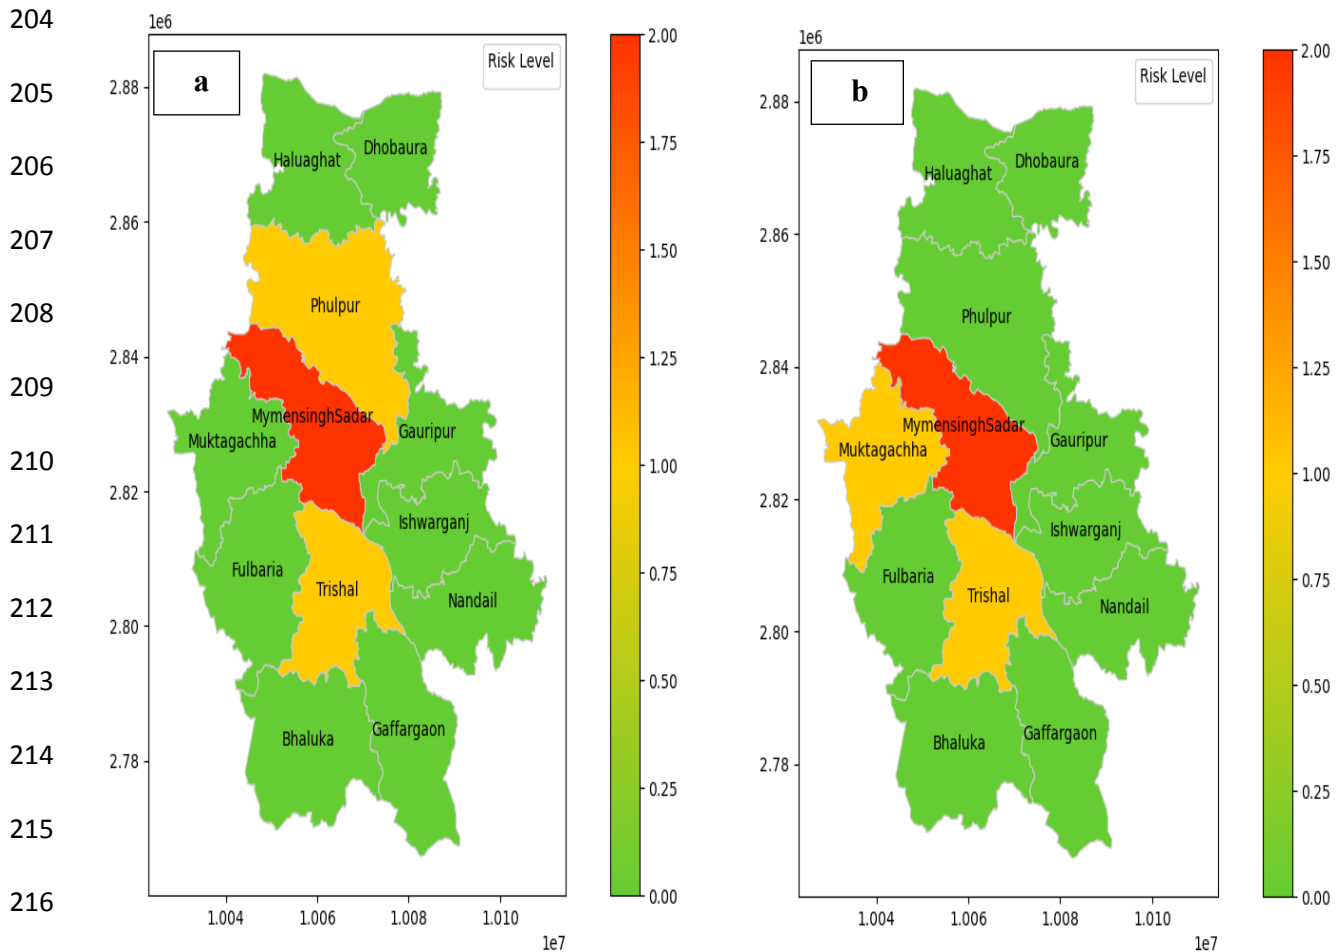

217  
218 **Figure 2(a-b):** Rabid animal bite risk map during 2022 (a) and 2023 (b) in different upazilas of  
219 Mymensingh district

### 220 3.5. Seasonality and annual trend in rabid animal bite cases from 2016 to 2023

221 The time series analysis indicates both seasonal variation and an increasing trend in rabid animal  
222 bite cases (**Figure 3**). The Augmented Dickey-Fuller test revealed that the seasonality trend was  
223 statistically significant ( $P < 0.01$ ). In 2020, likely due to the COVID-19 pandemic, no cases were  
224 recorded.

225

226

227

228

229

230

231

232

233

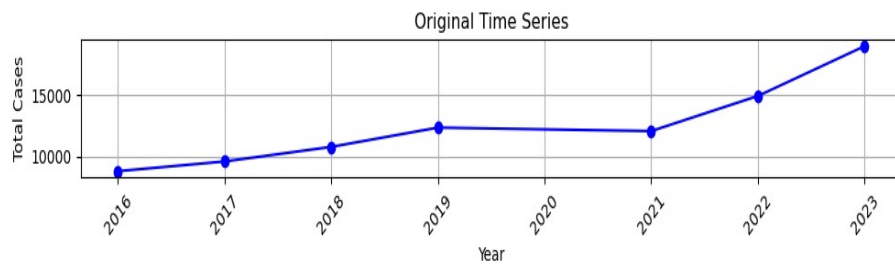

234

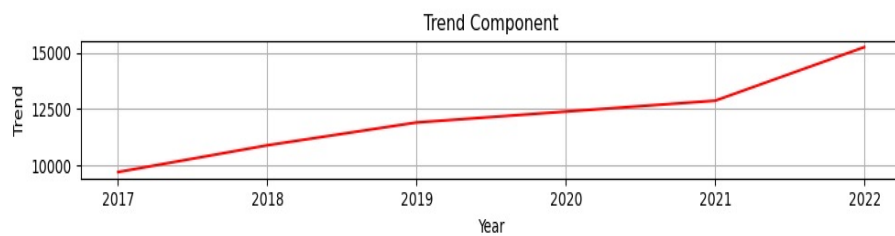

235

236

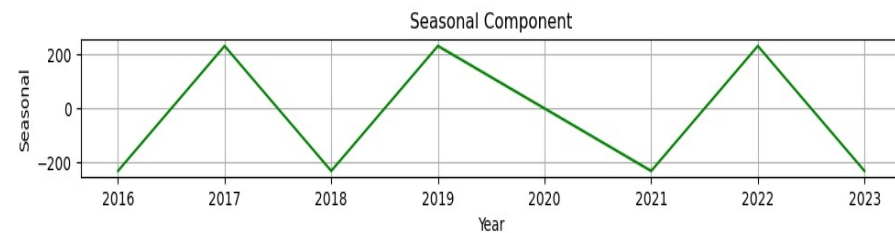

237

238

239

240

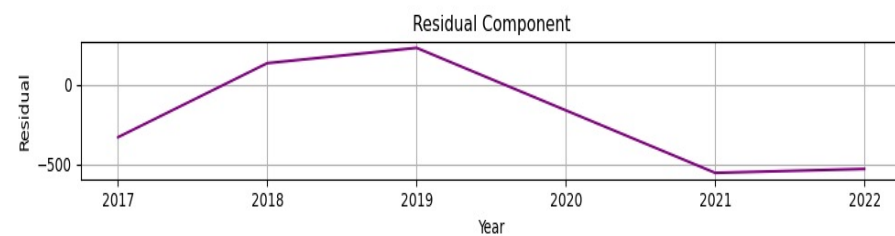

241

242

243

244

245 **Figure 3:** Time series analysis results showing seasonality, trend, and residuals in bites cases

246 reported from 2016 to 2023

247 **Figure 4** illustrates the annual variation and increasing trend of rabid animal bite cases. The  
248 Poisson regression test indicated that the annual trend was statistically significant ( $P < 0.001$ ).  
249 Notably, no cases were recorded in 2020, likely due to the impact of the COVID-19 pandemic.

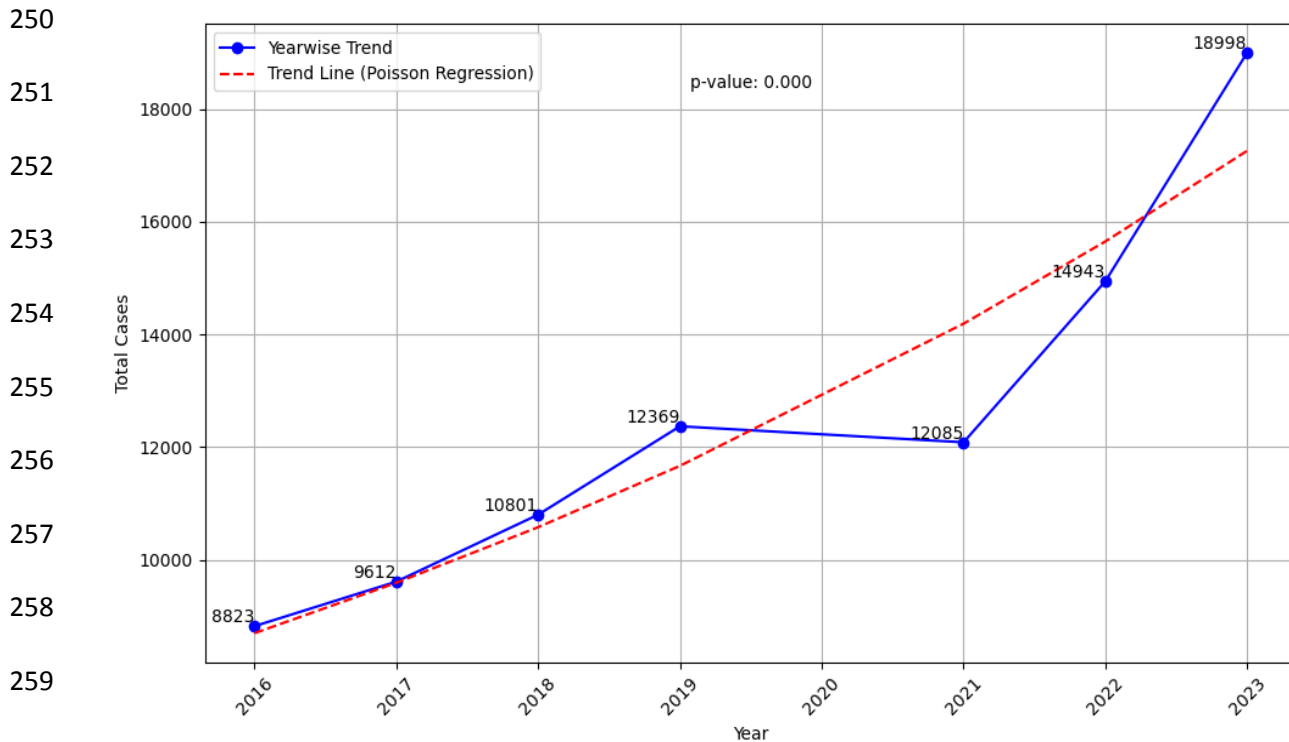

261 **Figure 4:** Yearly trends in rabid animal bite cases (2016-2023) reported in 2016 to 2023.

#### 262 4. Discussion

263 Results of this study highlight the need for improvements in healthcare practices and treatment  
264 protocols, particularly to ensure timely vaccination delivery. The increasing trend in rabid animal  
265 bite cases highlights the need to enhance surveillance and control measures. Targeted awareness  
266 campaigns and preventive measures, specifically tailored to high-risk groups such as males,  
267 children under 10 years of age, dogs, and cats, are essential. Coordinated efforts among healthcare  
268 professionals, policymakers, and community stakeholders are critical for effectively mitigating the

269 incidence of rabies cases, safeguarding public health, and achieving the goal of eradicating dog-  
270 mediated rabies by 2030 in the region.

271 The annual trends observed in this study reveal a noteworthy increase in the proportion of animal  
272 bites within the Mymensingh district over time. The rising proportion of animal bite injuries  
273 underscores the ongoing public health challenge of potential rabies exposure. These results align  
274 with several previous studies (21-23). The increasing proportion of animal bites may be attributed  
275 to rising human population and pet ownership, enhanced data recording quality, and increased  
276 community awareness of rabies prevention measures.

277 Given that rabies is a fatal disease, prompt administration of the vaccine after an incident is crucial.  
278 However, the majority of bite cases in this study received the vaccine within the first 24 hours after  
279 being bitten. This delay in vaccination may be attributed to a lack of awareness among the general  
280 population and a failure to recognize the importance of seeking immediate treatment following an  
281 animal bite. Post-exposure prophylaxis (PEP) stands as the most critical life-saving intervention  
282 to prevent rabies in humans following exposure (24). The average time taken to administer the  
283 vaccine after a bite is critical for the effectiveness of post-exposure prophylaxis (20, 25). Thus,  
284 efforts to increase public awareness about the urgency of seeking immediate medical attention and  
285 receiving the vaccine promptly after an animal bite are essential to enhance the timely delivery of  
286 post-exposure prophylaxis and mitigate the risk of rabies transmission.

287 There was a noticeable trend of incomplete vaccination courses among individuals. This may stem  
288 from limited access to post-exposure rabies vaccines at hospitals in each Upazila and lack of  
289 awareness regarding the importance of completing the full vaccine regimen. A study conducted in  
290 Vietnam highlighted a similar issue, where despite the availability of vaccines, fewer than 50% of  
291 patients completed their intramuscular vaccine regimen (26). This emphasizes the need for

292 intensified efforts to educate the public about the significance of completing the entire vaccination  
293 course to ensure optimal protection against rabies.

294 This study revealed that dogs and cats were the predominant animals involved in bites, consistent  
295 with numerous findings worldwide. Dogs accounted for 76–94% of reported bite cases in low- and  
296 middle-income countries, while cats accounted for 2–50% globally (11). Additionally, the  
297 presence of monkeys, foxes, and mongoose in the study indicates a broader spectrum of animals  
298 contributing to bites. The consistency in these findings across studies underscores the reliability of  
299 the observation that dogs and cats collectively account for approximately 90% of reported animal  
300 bites. Given these findings, proactive vaccination campaigns targeting dogs and cats in high-risk  
301 zones period can significantly reduce rabies cases in the district. This approach can help mitigate  
302 the risk of rabies transmission and protect both human and animal populations from this deadly  
303 disease.

304 The highest proportion of bite cases was observed in the age group up to 10 years old. Children's  
305 smaller size renders them more prone to dog and cat attacks, exacerbated by their unfamiliarity  
306 with handling pets on the street, inadvertently provoking such incidents (27). Moreover, in the  
307 home children interact with dogs and cats more commonly. This observation aligns with findings  
308 from another study, which noted that children often experience bites on their heads, necks,  
309 shoulders, and upper limbs (28). Reports from the World Health Organization (WHO) further  
310 highlight that children below the age of 15 are among the most vulnerable populations susceptible  
311 to rabies (11).

312 The present research findings indicate a significant gender discrepancy in animal bites, with males  
313 experiencing approximately twice as many bites as females. This observation is consistent with



314 previous studies, which have also noted a higher incidence of animal bites among males compared  
315 to females (29, 30).

316 The lower extremities of the body, particularly the legs, were found to be predominant sites for  
317 animal bites. This observation is consistent with another study, which reported that the majority  
318 of bites (73.1%) occurred in the lower extremities (7).

319 The percentage of type 3 bites increased from 3.6% in 2022 to 6.5% in 2023. The increase may be  
320 attributed to changes in animal behavior, human population density, the popularity of domestic  
321 pets, which increase animal contact and risk, and improved reporting and monitoring systems.  
322 Human Rabies Immunoglobulin (HRIG) is a life-saving immune biological, particularly necessary  
323 for individuals exposed to category 3 animal bites. These bites are characterized by severe wounds  
324 with a high risk of rabies transmission, necessitating immediate administration of HRIG (31).  
325 HRIG provides immediate protection by supplying neutralizing antibodies. Previous studies have  
326 shown that these antibodies play a crucial role in bridging the gap until the individual's immune  
327 system can generate vaccine-mediated antibodies (31).

328 The monthly distribution of rabid animal bite cases in the current study exhibited variation, with  
329 the highest number of cases reported from October to January. Earlier studies have reported similar  
330 findings of a higher percentage of rabid bite cases occurring during these months, including  
331 November, December (32). A similar trend has been observed in domestic ruminants rabies cases  
332 in Bangladesh during December, January, and July (6). This coincides with changes in animal  
333 behavior, such as breeding seasons or migration patterns, as well as increased animal activity and  
334 rabies transmission during these periods (6, 33).

335 The highest risk of rabid bite cases was Mymensingh Sadar, followed by Trishal. Underreporting  
336 in areas might lead to lower proportions. Rabies underreporting often occurs due to poor  
337 surveillance and diagnostic challenges, resulting in an underestimated disease burden (13).  
338 Depending exclusively on clinical diagnoses undermines the reliability of rabies surveillance  
339 systems (7). Therefore, the number of recorded animal bite cases in routine surveillance within  
340 the Mymensingh district might represent only a portion of the disease burden. Considering the  
341 challenges in diagnosing rabies in developing nations and the lack of precise human rabies trend  
342 data, surveillance data on animal bites becomes invaluable. This data offers essential insights to  
343 enhance rabies surveillance efforts and improve the allocation of medical and veterinary resources  
344 (34).

345 An effective rabies control strategy should prioritize enhancing collaboration and coordination  
346 across sectors using a 'One Health' approach, as recommended during the 2015 global rabies  
347 conference. Successful control of human rabies in certain Asian regions has been attributed to  
348 robust collaboration between human and animal sectors (35). The government of Bangladesh has  
349 initiated various strategies to eliminate rabies, including advocacy, communication, and social  
350 mobilization (ACSM), modern treatment for animal bites, mass dog vaccination (MDV), and dog  
351 population management (35). However, the program's effectiveness heavily relies on public  
352 awareness of rabies, attitudes toward animals, and informed healthcare-seeking behaviour  
353 following animal bites. Community knowledge, attitudes, and practices are vital in preventing and  
354 managing rabies, impacting human and animal populations (36).

355 Our study is limited by its reliance on hospital-based data collection, which might not fully capture  
356 the extent of rabies cases in the community. Hospital-based data primarily reflects individuals who  
357 seek medical care after experiencing moderate to severe animal bites, thus potentially

358 underestimating the true prevalence of rabies within the population. Conducting community-based  
359 research would offer a more comprehensive understanding of the magnitude of the issue by  
360 including individuals who may not seek medical attention for animal bites or who may be treated  
361 outside of hospital settings. By surveying households and communities, researchers can gather  
362 data on unreported or untreated animal bites, as well as attitudes, beliefs, and practices related to  
363 rabies prevention and management.

## 364 **5. Conclusion**

365 The findings of our study indicate several areas where improvements are needed in healthcare  
366 practices and treatment protocols related to rabies prevention and management. One important gap  
367 identified is the delay in delivering timely vaccinations following animal bites. This delay poses a  
368 considerable risk to individuals exposed to rabies and highlights the need for simplified processes  
369 to ensure prompt vaccination delivery. The rise in rabies cases highlights the importance of  
370 strengthening disease surveillance systems to detect and report cases promptly, as well as  
371 implementing targeted interventions to prevent further transmission. To address these challenges,  
372 targeted awareness campaigns and preventive measures tailored to high-risk groups are essential.  
373 This includes educating the public, particularly males and children under 10 years old who are  
374 more susceptible to animal bites, about the importance of seeking immediate medical attention and  
375 receiving timely vaccinations after exposure to rabies. Additionally, initiatives aimed at promoting  
376 responsible pet ownership practices and increasing vaccination coverage among dogs and cats can  
377 help reduce the risk of rabies transmission within communities. Achieving these goals requires  
378 coordinated efforts among healthcare professionals, policymakers, community stakeholders and a  
379 One Health approach. Collaboration across sectors is crucial for developing and implementing  
380 comprehensive rabies control and prevention strategies. By working together, we can effectively

381 mitigate the incidence of rabies cases, safeguard public health, and work towards the goal of  
382 eradicating dog-mediated rabies by 2030 in the region.

### 383 **Acknowledgements**

384 We extend our heartfelt appreciation to SKS Hospital for their invaluable assistance in furnishing  
385 the requisite data for the research. Their generosity and gracious support throughout the process  
386 are sincerely acknowledged.

387

### 388 **Authors' contributions**

389 Conceived and designed the experiments: AKMAR CSC. Data collection, input and curation: AR  
390 IS CSC. Data analysis: AR CSC AKMAR. Writing-original draft: CSC AR SB MMM.  
391 Supervision: MW MAE DPN. Writing Review & editing: MW AKMAR. All authors have read  
392 and agreed to the published version of the manuscript

393 **Funding:** This work was carried out without the support of any specific funding.

394 **Competing interests:** None declared.

395

### 396 **References**

- 397 1. Dodds WJ, Larson LJ, Christine KL, Schultz RD. Duration of immunity after rabies  
398 vaccination in dogs: The Rabies Challenge Fund research study. Canadian Journal of  
399 Veterinary Research. 2020;84(2):153-8.
- 400 2. Mandal K, Haldar SR, Satapathy DM. Geospatial Distribution and Sociodemographic  
401 Profile of Animal Bite Cases attending Anti-rabies Clinic of a Tertiary Care Hospital in  
402 Southern Odisha. APCRI Journal. 2022;24(2):1-6.

- 403 3. Masthi N, Vairavasolai P. Estimation of animal bites using GPS and google earth in an  
404 urban low income area of Bengaluru, South India. *APCRI Journal*. 2016;17(II):6-10.
- 405 4. Manning SE, Rupprecht CE, Fishbein D, Hanlon CA, Lumlertdacha B, Guerra M, et al.  
406 Human rabies prevention-United states, 2008. *MMWR Recomm Rep*. 2008;57:1-28.
- 407 5. Amiri S, Maleki Z, Nikbakht H-A, Hassanipour S, Salehiniya H, Ghayour A-R, et al.  
408 Epidemiological Patterns of Animal Bites in the Najafabad, Center of Iran (2012–2017).  
409 *Annals of Global Health*. 2020;86(1).
- 410 6. Noman Z, Anika T, Haque Z, Rahman A, Ward M, Martínez-López B. Risk factors for  
411 rabid animal bites: a study in domestic ruminants in Mymensingh district, Bangladesh.  
412 *Epidemiology & Infection*. 2021;149:e76.
- 413 7. Rohde RE, Rupprecht CE. Update on lyssaviruses and rabies: will past progress play as  
414 prologue in the near term towards future elimination? *Faculty reviews*. 2020;9.
- 415 8. Pattanayak S, Malla TK, Bara BK, Behera MK. Epidemiological study of animal bite  
416 victims and admission in general surgery department, in Southern Odisha: a cross sectional  
417 institutional study. *International Surgery Journal*. 2017;4(10):3470-3.
- 418 9. Hossain M, Bulbul T, Ahmed K, Ahmed Z, Salimuzzaman M, Haque MS, et al. Five-year  
419 (January 2004–December 2008) surveillance on animal bite and rabies vaccine utilization  
420 in the Infectious Disease Hospital, Dhaka, Bangladesh. *Vaccine*. 2011;29(5):1036-40.
- 421 10. Cleaveland S, Hampson K. Rabies elimination research: juxtaposing optimism,  
422 pragmatism and realism. *Proceedings of the Royal Society B: Biological Sciences*.  
423 2017;284(1869):20171880.
- 424 11. Organization WH. Zero by 30: the global strategic plan to end human deaths from dog-  
425 mediated rabies by 2030. 2018.

- 426 12. Fooks AR, Banyard AC, Horton DL, Johnson N, McElhinney LM, Jackson AC. Current  
427 status of rabies and prospects for elimination. *The Lancet*. 2014;384(9951):1389-99.
- 428 13. Organization WH. WHO expert consultation on rabies: second report: World Health  
429 Organization; 2013.
- 430 14. Meske M, Fanelli A, Rocha F, Awada L, Soto PC, Mapitse N, et al. Evolution of rabies in  
431 South America and inter-species dynamics (2009–2018). *Tropical Medicine and Infectious  
432 Disease*. 2021;6(2):98.
- 433 15. Ghosh S, Rana MS, Islam MK, Chowdhury S, Haider N, Kafi MAH, et al. Trends and  
434 clinico-epidemiological features of human rabies cases in Bangladesh 2006–2018.  
435 *Scientific reports*. 2020;10(1):2410.
- 436 16. Nel LH. Discrepancies in data reporting for rabies, Africa. *Emerging infectious diseases*.  
437 2013;19(4):529.
- 438 17. Ghosh S, Chowdhury S, Haider N, Bhowmik RK, Rana MS, Prue Marma AS, et al.  
439 Awareness of rabies and response to dog bites in a Bangladesh community. *Veterinary  
440 medicine and science*. 2016;2(3):161-9.
- 441 18. Mapatse MF. Public health awareness and seroprevalence of rabies in dogs in Limpopo  
442 National Park, and the phylogeny of rabies virus in Mozambique: University of Pretoria;  
443 2021.
- 444 19. Azad AK, Mohakhali D. National Preparedness and Response Plan for COVID-19,  
445 Bangladesh. Dhaka: Ministry of Health and Family Welfare. 2020.
- 446 20. Liu Q, Wang X, Liu B, Gong Y, Mkandawire N, Li W, et al. Improper wound treatment  
447 and delay of rabies post-exposure prophylaxis of animal bite victims in China: Prevalence  
448 and determinants. *PLoS neglected tropical diseases*. 2017;11(7):e0005663.

- 449 21. Fèvre EM, Kaboyo R, Persson V, Edelsten M, Coleman P, Cleaveland S. The epidemiology  
450 of animal bite injuries in Uganda and projections of the burden of rabies. *Tropical medicine  
451 & international health*. 2005;10(8):790-8.
- 452 22. Masiira B, Makumbi I, Matovu JK, Ario AR, Nabukenya I, Kihembo C, et al. Long term  
453 trends and spatial distribution of animal bite injuries and deaths due to human rabies  
454 infection in Uganda, 2001-2015. *PloS one*. 2018;13(8):e0198568.
- 455 23. Nikbakht H, Heydari H, Malakzadeh Kebria R, Yegane Kasgari M, Mirzad M, Hosseini S.  
456 Epidemiological patterns of animal bite injuries in victims under 18 year old in Babol, Iran  
457 (2010-14). *Journal of Babol University of Medical Sciences*. 2015;17(11):67-73.
- 458 24. Quiambao BP, Dy-Tioco HZ, Dizon RM, Crisostomo ME, Teuwen DE. Rabies post-  
459 exposure prophylaxis with purified equine rabies immunoglobulin: one-year follow-up of  
460 patients with laboratory-confirmed category III rabies exposure in the Philippines.  
461 *Vaccine*. 2009;27(51):7162-6.
- 462 25. Denis M, Knezevic I, Wilde H, Hemachudha T, Briggs D, Knopf L. An overview of the  
463 immunogenicity and effectiveness of current human rabies vaccines administered by  
464 intradermal route. *Vaccine*. 2019;37:A99-A106.
- 465 26. Tran CH, Afriyie DO, Pham TN, Otsu S, Urabe M, Dang AD, et al. Rabies post-exposure  
466 prophylaxis initiation and adherence among patients in Vietnam, 2014–2016. *Vaccine*.  
467 2019;37:A54-A63.
- 468 27. Patel S, Toppo M, Lodha R. An epidemiological study of animal bite cases in a tertiary  
469 care center of Bhopal city: a cross-sectional study. *Int J Med Sci Public Health*.  
470 2017;6(3):1.

- 471 28. Overall KL, Love M. Dog bites to humans—demography, epidemiology, injury, and risk.  
472 Journal of the American Veterinary Medical Association. 2001;218(12):1923-34.
- 473 29. Gebru G, Romha G, Asefa A, Hadush H, Biedemariam M. Risk factors and spatio-temporal  
474 patterns of human rabies exposure in Northwestern Tigray, Ethiopia. Annals of global  
475 health. 2019;85(1).
- 476 30. Kilic B, Unal B, Semin S, Konakci SK. An important public health problem: rabies  
477 suspected bites and post-exposure prophylaxis in a health district in Turkey. International  
478 journal of infectious diseases. 2006;10(3):248-54.
- 479 31. Haradanhalli RS, Fotedar N, Kumari N, Narayana DA. Safety and clinical efficacy of  
480 human rabies immunoglobulin in post exposure prophylaxis for category III animal  
481 exposures. Human Vaccines & Immunotherapeutics. 2022;18(5):2081024.
- 482 32. Kinge KV, Supe AC. Epidemiology of animal bite cases reported to anti-rabies vaccination  
483 OPD at a tertiary-care hospital, Nagpur. Int J Med Sci Public Health. 2016;5(8):1579-82.
- 484 33. Guo D, Yin W, Yu H, Thill J-C, Yang W, Chen F, et al. The role of socioeconomic and  
485 climatic factors in the spatio-temporal variation of human rabies in China. BMC infectious  
486 diseases. 2018;18:1-13.
- 487 34. Cleaveland S, Fevre EM, Kaare M, Coleman PG. Estimating human rabies mortality in the  
488 United Republic of Tanzania from dog bite injuries. Bulletin of the World health  
489 Organization. 2002;80(4):304-10.
- 490 35. Byrnes H, Britton A, Bhutia T. Eliminating dog-mediated rabies in Sikkim, India: a 10-  
491 year pathway to success for the SARAH program. Frontiers in veterinary science.  
492 2017;4:28.



- 493 36. Tenzin, Dhand NK, Rai BD, Changlo, Tenzin S, Tsheten K, et al. Community-based study  
494 on knowledge, attitudes and perception of rabies in Gelephu, south-central Bhutan.  
495 International health. 2012;4(3):210-9.  
496
